# Supplementary material for: A novel mechanism for the biogenesis of outer membrane vesicles in Gram-negative bacteria
Source: PubMed Central journal article supplement (PMC4737802; doi:10.1038/ncomms10515), 2016-01-25
Supplement: ncomms10515-s1.pdf [file ncomms10515-s1.pdf]

## SUPPLEMENTARY FIGURES

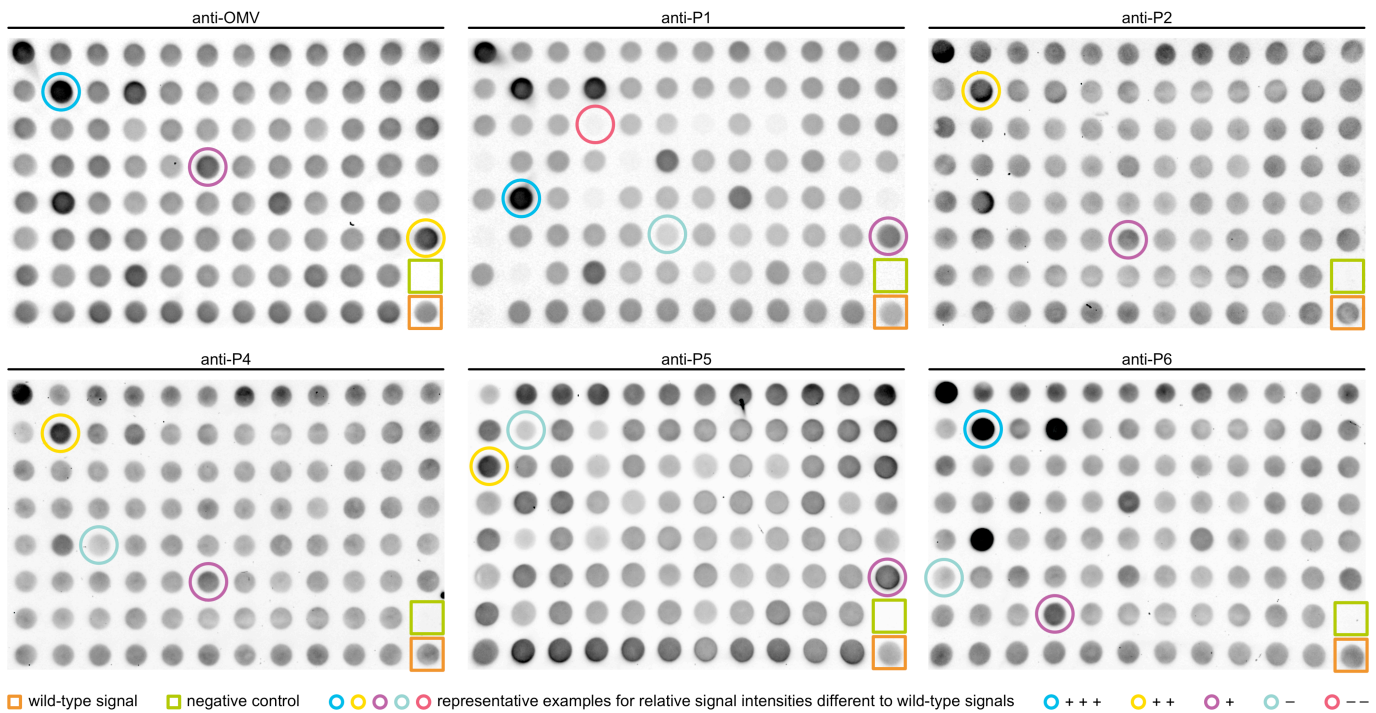

**Supplementary Figure 1 | Representative examples of the dot blot screening.** Shown are representative examples of dot blots incubated with anti-OMV, -P1, -P2, -P4, -P5, or -P6 mouse antiserum. Each dot blot was spotted with transposon insertion mutant filtrates, a wild-type filtrate as a positive control, and a sterile control filtrate (BHI-NAD-PPIX broth) as a negative control. For details please see the respective method section (transposon mutagenesis and dot blot screen). Relative intensities of dot blot signals derived from transposon insertion mutants were evaluated by eye through comparison with the respective wild-type signals in combination with the respective  $OD_{490}$  values. Colored circles highlight representative examples of relative signal intensities different to wild-type signals. Increased relative signal intensities are marked by +, ++, or +++ (in ascending order), whereas decreased relative signal intensities are given by – or – – (in descending order).

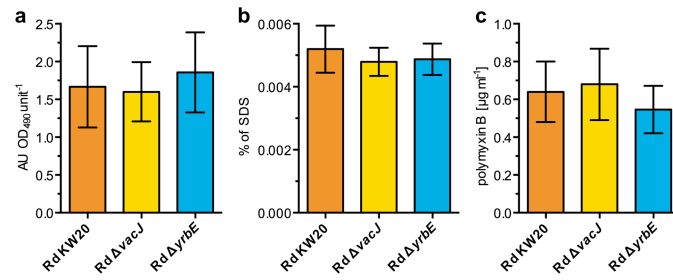

**Supplementary Figure 2 | PL transporter mutants reveal intact OM integrity in *H. influenzae*. (a)**

Cell lysis of Rd KW20, Rd  $\Delta vacJ$ , and Rd  $\Delta yrbE$  was investigated by dot blot analysis. Mean values with s.e.m. are shown (n=6 biological replicates). **(b, c)** Mean minimal inhibitory concentrations with s.e.m. of SDS **(b)** and polymyxin B **(c)** are shown (n=5 biological replicates).

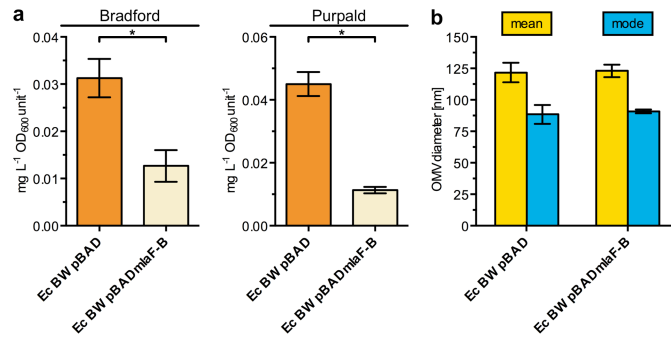

**Supplementary Figure 3 | Overexpression of the *mIa* gene cluster results in decreased OMV production in *E. coli*.** (a) OMV preparations derived from equivalent  $\text{OD}_{600}$  units of cultured wild-type containing vector control (Ec BW pBAD) or expression plasmid (Ec BW pBADmIaF-B) were analyzed for total protein (Bradford) and lipopolysaccharide (Purpald). Mean values with s.e.m. are shown (n=6 biological replicates). Significant differences between the data sets are marked by asterisks ( $P < 0.05$ ; unpaired t test). (b) Distributions of OMV sizes produced by the strains were determined by nanoparticle tracking analysis. Mean values with s.d. of mean and mode OMV diameter sizes within respective OMV preparations are shown (n=6 biological replicates).

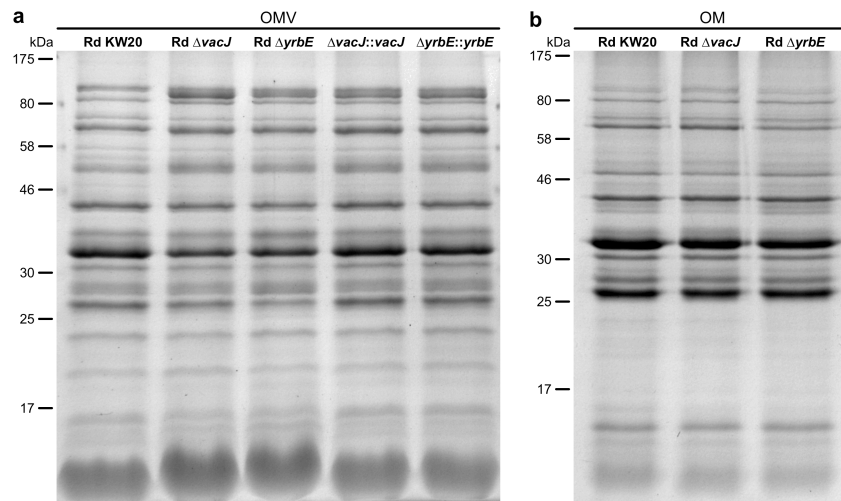

**Supplementary Figure 4 | OMV and OM protein profile comparisons between *H. influenzae* strains.**

(a, b) The protein profiles of OMV (a) or OM (b) preparations derived from Rd KW20, Rd  $\Delta vacJ$ , Rd  $\Delta yrbE$ , Rd  $\Delta vacJ::vacJ$ , and Rd  $\Delta yrbE::yrbE$  were compared by SDS-PAGE. Approximately 8  $\mu$ g protein equivalent of each sample was used for the analysis. Lines to the left indicate the molecular masses of the protein standards in kDa.



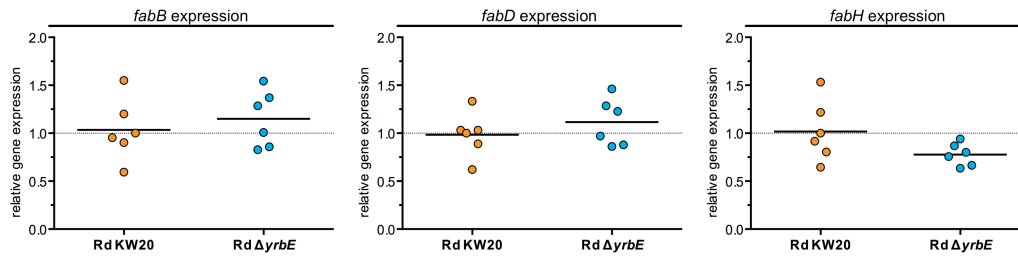

**Supplementary Figure 5 | PL accumulation in OMVs derived from *H. influenzae* PL transporter mutant Rd  $\Delta yrbE$  is not a result of increased expression of fatty acid biosynthesis genes.** Relative expressions of *fabB*, *fabD*, and *fabH* in Rd KW20 and Rd  $\Delta yrbE$  grown in BHI-NAD-hemin were determined by qRT-PCR. Horizontal bars highlight the mean of each data set (n=6 biological replicates). Dotted lines indicate a relative gene expression of 1.

## Haemophilus influenzae

*H. influenzae* HI\_0718 (*vacJ*)

TGCACCTATTTCCAAACGTGAAGCGGATACACTATTTTAAATCGTCTTGAACAAAATACTGATAAACCTCGTCATCGTAATGAATATCATCCGGGAGAGGAAGTTCGT  
GTGACTGAAGGGCCATTTGCTGATTTTAAATGGTACAGTAGAAGAAGTGGATTATGAAAAAGGCCGCTTAAAAGTGTCTGTATCAATGTTTGGCCGTGCTACACCAG  
TTGAGCTTGAATTTGGTCAAGTTGAAAAATACACTAAGAAATGATTAATAATATAACCGCACTTTTGTAGTGC GGTT **TTTTGTTTTTAAATGTTTGTGAAACAGCA**  
**TAAAAGAGTGT**TTTTATACACAAAAATTTGTTGTTATTTTCACAAATAGGTAGAAATATCCATATTTATGTAAGGATTAATAA **ATC**

*H. influenzae* HI\_1087 (*yrbF*)

GTTTTTCTACTTTCCTCTCTATAACTTTCCTCTCTATAACTTTCCTCTCTATAACTTTTCTCTTGAATCTTTTTTATCAAACTGTATCTTTTACAGGCTTATTA  
TTTATAAGCATTTATCAATGTTTATTTCCATAAACAAAGTATTATTAATAATTCATAAATAATGAAGAAATGTAAAGC **TTCTTTAGTGAGGTCAAAAAGAATGTT**  
**ACTATTACAAAAATTTTAACTATAAAAAATAGAAATAAAATTTATCACTATTTTTTA** TGACCACATCAAAGTTAAACCAAGAGATGTGTTGCGATAAAAAAGAAAA  
ACTTCATCTTTAAATTAACAAATCTAACTTTTTTCAGGTCATATAAAACTGATTGAACCTTTTTATTATAAACGAGATATA **ATC**

## Vibrio cholerae

*V. cholerae* VC\_2048 (*vacJ*)

GAGGGCATGGCAGAGGGTCAATCGGTGAAAGTCACCATTAATCTAGGCGAGCAGGTTAAGGTTGATCCTAACGCAGTGTGATCGTATCTATCCATGCTCCCGGTT  
CGCCAATGCCTGTGCTGCAGCCGTTATCCGCTAGGTGAGTTTCCAAGAACCCTGGTGTGGATGACAATAACAGCATGATGGAAGGATCAAAATTTGTCAGCTCT  
TGAGTCGTATGTGGTACGTGTGCGTATCGACAGCGATGGTAATGTGGCGACGAAAAGCGGTGACTGGTATGCCGAAAGTCCCACAAATGAAAAACAGGTGAGCCTGTT  
GACGTTGTGCTTGATAAGCAGTATGAATAAAAT **CACAAGCTGAAAAATAATATAACAATAAGGCCGAT**GGGATCATCGGCCT **ATC**

*V. cholerae* VC\_2520 (*yrbF*)

GACTCTTAGAGCAAGGCAAAACACCTCCATCAATGGACGAATTCACGCAAGGTCAGGCATCTTCAGCCATTTAGGCAGAGAATTGGCCGCAATTTTGACGTGTTGG  
GTATTAAGGGAAGTGAAGTTCCAATTAATATCCTTATCCCTTTCGATTTTGCCTGTTTGTACAGTAAACGTCAGCCTTTAAAGCTGTTCTTAGGTTGTC  
GTCGGCATGCTATCGACTATGCTGGATGAAGACTTTTATCGGGTTTTAGACGCAAAATGAGTTGAACGACTTTGACAATCTTGGTCAAGAACCCAAG **CATGGAT**  
**TGATGCGTGT**TTTAAATGCACCATATTGTGCATTTATCATGCGCATTCTTTCAGGATGTCGACCTAACAGTGAAGTGCCCAT **ATC**

## Escherichia coli

*E. coli* b\_2346 (*vacJ*)

CGGGAGGGGAGTCCGCTTTCATCTATTTCTATTTTTTTGCGCGCTCTTTTTCTTCGCTCTCAACTTCAATTTTCGTCGCTGTGTTGATCAATTTTGTGCTGTTGCCA  
TGGTCTCTTCTTGAATTAGCACGTATAGCTAAAGCGTAGCGGCTTTTTTGTCTCGCACTGACGGGAGTTACTCTGAAAATGTAGAAAAGGCTGCGTTTTGCCTTT  
TTCTGTTCTATAGAATCAAGTAGCCTACAGGGCGCGGATTACCAGGCTATGATCAAATCAGCAAATCA **GGGCGTCTGGACATCAGTTGACGTGCTGTTACAATCG**  
**CCCACACCTAAAC**AGGCGGATACGGTATCGTTCCGTCATGGATGGCAAACCTGCATAAGCCATAAAAAACAGGGAGACATTT **ATC**

*E. coli* b\_3195 (*yrbF*)

TGCTGAGAGACGCGGCAAGCGAGACGATGACTTCTGGTAACGATGTACCAATACTGACCACCGTCATGCCGATGATCAGCGGGGGATGCCAAAGGTTCCGGCAAA  
GAATAGACGCGGCAAAAACAGGCGGTGCGCACTGTAAACGACCAAAAAGTAAACCAACAATTAACAGTGCCTAGCTAAAAGCATCTAACGTCCTTCTCAGGTA  
TACTCGCGGTCCGCTG **AAGATTTTCAGAAAAGCCGTAACGGATGCTTAATTTTGACTTTATGCGGCT**AAAAAGTAAAACAAATGCCAGCTTTTCGCTAACCCAGGCG  
GGTAATATCTGTAATATGTTGGGTTCAAGGTTAAATTTGAGCGCATGCTTAGAAAATCAACGCAAGACGAAGGTTGAAT **ATC**

**Supplementary Figure 6 | *In silico* analyses of potential Fur binding sites in upstream regions of *vacJ* and the *yrb* gene cluster.** The 400 nucleotide regions upstream of the translational start codons (highlighted in green) of *vacJ* and *yrbF* are shown for *H. influenzae*, *V. cholerae*, and *E. coli*, respectively. The promoter regions according to Neural Network Promoter Prediction<sup>1</sup> are indicated in yellow with the +1 transcriptional start site in bold. Please note that in case of the *yrb* gene cluster of *H. influenzae* two promoters with equal scores were identified. Consequently, both are highlighted in yellow and two +1 transcriptional start sites are shown in bold. The putative areas containing Fur binding sites according to EMBOSS Needle<sup>2-5</sup> are underlined and were obtained from Harrison *et al.*<sup>6</sup> for *H. influenzae*, Escolar *et al.*<sup>7</sup> for *E. coli*, and Mey *et al.*<sup>8</sup> for *V. cholerae* using the best or second best conserved nucleotide, if applicable.

## SUPPLEMENTARY TABLES

**Supplementary Table 1:** Transposon insertion mutant phenotypes detected by dot blot screening.

| Gene no. <sup>†</sup> | Description <sup>†</sup>                             | Insertion <sup>†</sup> | Relative signal intensity <sup>‡</sup> |     |    |    |     |     |
|-----------------------|------------------------------------------------------|------------------------|----------------------------------------|-----|----|----|-----|-----|
|                       |                                                      |                        | OMV                                    | P1  | P2 | P4 | P5  | P6  |
| HI_0037               | Rod shape-determining protein MreB                   | dn 993-1019            | ++                                     | ++  | +  | +  | ++  | +   |
| HI_0401               | Outer membrane protein P1                            | dn 315                 | -                                      | --  |    |    |     |     |
| HI_0457               | Hypothetical protein HI0457                          | up 40                  | +                                      | +   | +  |    | +   |     |
| HI_0528               | Tyrosine-specific transport protein TyrP             | dn 953                 | ++                                     | ++  | +  | +  | ++  | +   |
| HI_0572               | Peroxiredoxin hybrid Prx5                            | dn 10-38               | --                                     | -   | -  | -  | -   | -   |
| HI_0854               | Heme iron utilization protein                        | up 65                  | -                                      | -   | -  | -  | -   | -   |
| HI_0980               | DNA-binding protein Fis                              | dn 250                 | +                                      |     |    |    | +   |     |
| HI_1083               | NTP binding protein YrbB                             | dn 92-115              | ++                                     | +   | +  |    | +   | +   |
| HI_1086               | ABC transporter permease YrbE                        | dn 345                 | ++                                     | +   | +  | +  | ++  | +   |
| HI_1099               | Hypothetical protein HI1099                          | dn 274                 | +                                      |     | +  |    | +   | +   |
| HI_1164               | Outer membrane protein P5                            | dn 657                 | +++                                    | +++ | +  | +  | -   | +++ |
| HI_1181               | Phosphoheptose isomerase GmhA                        | dn 140                 | ++                                     | ++  | +  | +  |     | +   |
| HI_1213               | Thiol-disulfide interchange protein DsbC             | dn 607                 | +++                                    | ++  | +  | +  | +++ | +   |
| HI_1251               | Virulence-associated protein A                       | dn 194-208             | +                                      |     |    |    | +   |     |
| HI_1441               | Stringent starvation protein A                       | dn 299-316             | -                                      |     |    |    |     |     |
| HI_1587               | DNA-binding protein H-NS                             | up 9                   | +                                      |     |    |    | +   |     |
| HI_1676               | Molybdenum cofactor biosynthesis protein A           | dn 458-470             | +                                      |     |    | -  | +   | -   |
| HI_1683               | Na(+)-translocating NADH-quinone reductase subunit E | up 162                 | +                                      |     |    |    | +   |     |
| HI_1702               | Methyltransferase MetE                               | dn 47-1537             | +                                      | +   | +  |    | +   |     |
| HI_1727               | Argininosuccinate synthase ArgG                      | dn 488-1259            | +                                      |     |    |    | +   | +   |

<sup>†</sup>Identified gene disruptions that lead to altered OMV production and amounts of the OMPs P1, P2, P4, P5, or P6 in OMVs are ordered by their corresponding gene numbers, which are listed along with a description of their normal gene products.

<sup>†</sup>Transposon insertion sites of disrupted genes are given by the number of base pairs upstream (up) or downstream (dn) of the respective translational start site. In the event that several transposon insertions within a gene are leading to the same or a similar phenotype, the first and the last insertion site are given separated by a hyphen.

<sup>‡</sup>Relative intensities of dot blot signals derived from transposon insertion mutants were evaluated by eye through comparison with the respective wild-type signals in combination with the respective OD<sub>490</sub> values. Relative signal intensities represent mean phenotypes of two independent experiments per transposon insertion mutant. If applicable, the mean phenotypes of mutants with identical or different transposon insertions within the same gene were averaged. Increased relative signal intensities are marked by one, two, or three plus signs (in ascending order), whereas decreased relative signal intensities are highlighted by one or two minus signs (in descending order). A blank field indicates no visible differences compared to wild-type signals. Representative examples for dot blots as well as examples for the evaluation of relative signal intensities are provided in Supplementary Fig. 1.

**Supplementary Table 2: OMV and OM proteins derived from Rd KW20, Rd *ΔvacJ*, and Rd *ΔyrbE* identified by mass spectrometry.**

| Identified protein*                                                       | Accession no. | Gene no. | kDa <sup>†</sup> | Loc. <sup>‡</sup> | OMV <sup>§</sup> |                 |                 | OM <sup>§</sup> |                 |                 |
|---------------------------------------------------------------------------|---------------|----------|------------------|-------------------|------------------|-----------------|-----------------|-----------------|-----------------|-----------------|
|                                                                           |               |          |                  |                   | Rd KW20          | Rd <i>ΔvacJ</i> | Rd <i>ΔyrbE</i> | Rd KW20         | Rd <i>ΔvacJ</i> | Rd <i>ΔyrbE</i> |
| Outer membrane protein 26                                                 | gij16272853   | HI_0916  | 22               | OM                | 727-1            | 436-8           | 399-8           | 120-15          | 175-9           | 234-11          |
| Outer membrane protein P6                                                 | gij16272329   | HI_0381  | 16               | OM                | 716-2            | 501-6           | 374-9           | 325-3           | 217-5           | 334-5           |
| Outer membrane protein P2                                                 | gij16272106   | HI_0139  | 39               | OM                | 706-3            | 976-1           | 1008-1          | 771-1           | 523-1           | 1110-1          |
| Galactose ABC transporter, periplasmic-binding protein MglB               | gij1573835    | HI_0822  | 38               | PP                | 700-4            | 892-2           | 900-2           | 133-11          | 227-4           | 240-10          |
| Hypothetical protein HI1492                                               | gij16273393   | HI_1492  | 19               | U                 | 643-5            | 567-4           | 455-7           | –               | –               | –               |
| Oxidoreductase, thiol:disulfide interchange protein DsbA                  | gij16272787   | HI_0846  | 23               | PP                | 625-6            | 639-3           | 548-5           | –               | –               | –               |
| High-affinity zinc transporter substrate-binding protein ZnuA             | gij16272089   | HI_0119  | 38               | PP                | 450-7            | 457-7           | 502-6           | 96-21           | 164-11          | 277-8           |
| D-methionine-binding lipoprotein MetQ                                     | gij16272562   | HI_0620  | 30               | IM                | 420-8            | 261-15          | 178-23          | 88-25           | 139-13          | 146-31          |
| Serine protease HtrA                                                      | gij16273177   | HI_1259  | 49               | PP                | 337-9            | 336-9           | 326-10          | –               | 87-28           | 157-27          |
| Sialic acid-binding periplasmic protein SiaP                              | gij16272113   | HI_0146  | 37               | PP                | 317-10           | 292-12          | 231-15          | –               | –               | –               |
| D-ribose transporter subunit RbsB                                         | gij16272448   | HI_0504  | 30               | PP                | 286-11           | 560-5           | 567-4           | –               | –               | –               |
| Translocation protein TolB                                                | gij16272330   | HI_0382  | 45               | U                 | 282-12           | 305-10          | 195-20          | 116-17          | 105-19          | 171-24          |
| Thiol-disulfide interchange protein DsbC                                  | gij16273132   | HI_1213  | 25               | PP                | 281-13           | 165-25          | 155-26          | –               | –               | –               |
| Arginine ABC transporter substrate-binding protein                        | gij16273101   | HI_1179  | 26               | PP                | 246-14           | 296-11          | 320-11          | –               | 83-31           | 88-76           |
| Hypothetical protein HI1505                                               | gij16273407   | HI_1505  | 34               | CP                | 245-15           | –               | 116-38          | –               | –               | –               |
| FKBP-type peptidyl-prolyl cis-trans isomerase FkpA                        | gij16272517   | HI_0574  | 26               | PP                | 214-16           | 237-17          | 151-27          | –               | –               | –               |
| Protein D, glycerophosphodiester phosphodiesterase                        | gij16272631   | HI_0689  | 42               | OM                | 198-17           | 274-14          | 181-21          | 98-20           | 79-33           | 161-26          |
| Antigen, penicillin-binding protein activator LpoA                        | gij16273542   | HI_1655  | 64               | OM                | 198-18           | 291-13          | 610-3           | –               | –               | –               |
| Thiamin ABC transporter substrate-binding protein TbpA                    | gij16272953   | HI_1019  | 37               | PP                | 195-19           | 88-37           | 112-41          | –               | –               | –               |
| Hypothetical protein HI1681                                               | gij16273568   | HI_1681  | 23               | U                 | 184-20           | 228-18          | 108-44          | 92-22           | 111-17          | 186-21          |
| Iron-utilization periplasmic protein hFbpA                                | gij30995354   | HI_0097  | 36               | PP                | 179-21           | 213-21          | 242-13          | –               | –               | –               |
| Peptidyl-prolyl cis-trans isomerase                                       | gij30995417   | HI_1004  | 70               | IM                | 176-22           | 96-35           | 101-47          | 105-19          | 114-16          | 204-17          |
| Outer membrane protein P1                                                 | gij16272350   | HI_0401  | 49               | OM                | 163-23           | 215-20          | 212-17          | 162-8           | 301-2           | 373-4           |
| Hypothetical protein HI1427                                               | gij16273332   | HI_1427  | 31               | U                 | 159-24           | 104-33          | 206-18          | –               | 61-59           | 112-47          |
| Opacity protein (HI1174)                                                  | gij30995429   | HI_1174  | 17               | OM                | 156-25           | 89-36           | –               | 66-40           | –               | –               |
| Outer membrane protein P4                                                 | gij16272635   | HI_0693  | 30               | OM                | 140-26           | 167-23          | 196-19          | 171-7           | 171-10          | 259-9           |
| L-asparaginase II                                                         | gij16272686   | HI_0745  | 37               | PP                | 138-27           | 146-27          | 123-36          | –               | –               | –               |
| Lipoprotein, outer membrane protein assembly factor BamC                  | gij16272214   | HI_0256  | 24               | OM                | 112-28           | 167-24          | 174-24          | –               | –               | 96-62           |
| Hypothetical protein HI0449                                               | gij16272397   | HI_0449  | 20               | U                 | 111-29           | 187-22          | 69-57           | –               | 61-58           | 65-109          |
| Hypothetical protein HI1709                                               | gij16273596   | HI_1709  | 13               | U                 | 108-30           | 158-26          | 106-45          | –               | –               | –               |
| Spermidine/putrescine ABC transporter substrate-binding protein (HI1344)  | gij16273254   | HI_1344  | 42               | PP                | 107-31           | 243-16          | 240-14          | 126-12          | –               | 115-43          |
| Bifunctional 2',3'-cyclic nucleotide 2'-phosphodiesterase/3'-nucleotidase | gij16272527   | HI_0583  | 73               | PP                | 102-32           | 85-38           | 137-31          | –               | –               | –               |
| Elongation factor Tu                                                      | gij16272522   | HI_0578  | 43               | CP                | 101-33           | 67-48           | 76-55           | 122-13          | 77-37           | 113-45          |
| Outer membrane protein P5                                                 | gij16273088   | HI_1164  | 38               | OM                | 93-34            | 80-43           | 214-16          | 358-2           | 258-3           | 549-3           |
| Small protein A                                                           | gij542123256  | HI_0838  | 16               | OM                | 90-35            | 77-44           | 132-33          | –               | –               | 105-54          |
| Hypothetical protein HI0973                                               | gij16272910   | HI_0973  | 31               | OM                | 89-36            | 124-30          | 149-28          | –               | –               | –               |
| Branched chain amino acid ABC transporter substrate-binding protein       | gij16273512   | HI_1624  | 26               | U                 | 85-37            | 64-51           | 133-32          | –               | –               | –               |
| Trigger factor                                                            | gij16272653   | HI_0713  | 48               | CP                | 84-38            | –               | 60-60           | –               | –               | 85-78           |
| Amino acid ABC transporter substrate-binding protein                      | gij16273008   | HI_1080  | 28               | PP                | 79-39            | 226-19          | 282-12          | –               | –               | –               |
| Hypothetical protein HI0177, outer membrane protein assembly factor BamC  | gij16272142   | HI_0177  | 29               | OM                | 76-40            | 143-28          | 168-25          | 221-5           | 185-8           | 154-28          |
| Oligopeptide ABC transporter substrate-binding protein                    | gij16273049   | HI_1124  | 61               | PP                | 75-41            | –               | –               | –               | –               | –               |
| Opacity protein (HI1457)                                                  | gij16273363   | HI_1457  | 19               | OM                | 69-42            | 74-45           | 112-39          | –               | –               | –               |
| 50S ribosomal protein L7/L12                                              | gij16272584   | HI_0641  | 12               | U                 | 68-43            | –               | –               | 73-34           | 60-60           | 104-56          |
| Bacteriophage Mu I protein                                                | gij16273406   | HI_1504  | 39               | CP                | 64-44            | –               | –               | –               | –               | –               |
| Protective surface antigen D15                                            | gij16272854   | HI_0917  | 87               | OM                | 62-45            | 126-29          | 84-52           | 257-4           | 206-6           | 315-6           |

|                                                                          |              |              |     |    |       |        |        |        |        |        |
|--------------------------------------------------------------------------|--------------|--------------|-----|----|-------|--------|--------|--------|--------|--------|
| Molybdenum ABC transporter substrate-binding protein                     | gij16273580  | HI_1693      | 27  | PP | 61-46 | 85-39  | -      | -      | -      | -      |
| Ferric ABC transporter protein                                           | gij16272098  | HI_0131      | 38  | U  | 58-47 | -      | 179-22 | -      | -      | -      |
| NAD nucleotidase                                                         | gij16272169  | HI_0206      | 66  | U  | -     | 119-31 | 94-49  | -      | -      | 128-33 |
| ABC transporter, periplasmic binding protein YrbC                        | gij16273012  | HI_1084      | 25  | U  | -     | 114-32 | 92-50  | -      | -      | 74-95  |
| Heme-hemopexin utilization protein A                                     | gij16272222  | HI_0264      | 99  | EC | -     | 98-34  | -      | -      | -      | -      |
| Iron-chelated ABC transporter substrate-binding protein                  | gij16272311  | HI_0362      | 32  | PP | -     | 83-40  | 77-54  | -      | -      | 94-66  |
| Stationary-phase survival protein SurA                                   | gij16272406  | HI_0458      | 35  | PP | -     | 82-41  | 111-42 | 60-48  | -      | -      |
| Hypothetical protein HI1658                                              | gij16273545  | HI_1658      | 20  | PP | -     | 80-42  | 124-35 | 120-14 | 93-26  | 213-15 |
| Molecular chaperone DnaK                                                 | gij16273156  | HI_1237      | 68  | CP | -     | 68-46  | 99-48  | 61-46  | 78-35  | 153-29 |
| D-xylose transporter subunit XylF                                        | gij16273036  | HI_1111      | 36  | PP | -     | 68-47  | 117-37 | -      | -      | -      |
| Hypothetical protein HI0930                                              | gij16272867  | HI_0930      | 22  | EC | -     | 67-49  | 88-51  | -      | -      | -      |
| Heme/hemopexin-binding protein B                                         | gij16272221  | HI_0263      | 63  | OM | -     | 65-50  | -      | -      | 61-57  | -      |
| DNA-binding protein HU-alpha                                             | gij30995375  | HI_0430      | 9   | CP | -     | 64-52  | 109-43 | -      | 122-15 | 229-13 |
| Immunoglobulin A1 protease                                               | gij16272928  | HI_0990      | 186 | OM | -     | -      | 145-29 | 72-35  | -      | 84-79  |
| Transferrin-binding protein                                              | gij16273136  | HI_1217      | 103 | OM | -     | -      | 139-30 | 136-10 | 144-12 | 294-7  |
| 15 kDa peptidoglycan-associated lipoprotein                              | gij16273474  | HI_1579      | 15  | OM | -     | -      | 132-34 | 79-30  | 81-32  | 116-42 |
| Phosphopyruvate hydratase                                                | gij16272869  | HI_0932      | 46  | CP | -     | -      | 112-40 | -      | -      | 209-16 |
| Lipoprotein Nlpl                                                         | gij16272193  | HI_0230      | 36  | IM | -     | -      | 104-46 | -      | -      | -      |
| Spermidine/putrescine ABC transporter substrate-binding protein (HI0498) | gij30995379  | HI_0498      | 40  | PP | -     | -      | 79-53  | -      | -      | -      |
| Hypothetical protein HI1008, competence protein ComEA                    | gij16272943  | HI_1008      | 12  | IM | -     | -      | 74-56  | -      | -      | -      |
| Hypothetical protein HI0205                                              | gij16272168  | HI_0205      | 29  | U  | -     | -      | 62-58  | -      | -      | -      |
| Hypothetical protein HI1512                                              | gij16273414  | HI_1512      | 13  | U  | -     | -      | 61-59  | -      | -      | -      |
| Probable hemoglobin and hemoglobin-haptoglobin-binding protein 4         | gij19864326  | HI_1565/1567 | 114 | OM | -     | -      | -      | 178-6  | 73-43  | 147-30 |
| Heme-binding lipoprotein                                                 | gij16272793  | HI_0853      | 61  | PP | -     | -      | -      | 160-9  | 188-7  | 618-2  |
| Hemin receptor                                                           | gij16272087  | HI_0113      | 85  | OM | -     | -      | -      | 118-16 | 67-48  | 132-32 |
| L-lactate dehydrogenase                                                  | gij16273624  | HI_1739.1    | 42  | CP | -     | -      | -      | 106-18 | 100-22 | 190-19 |
| HflK protein                                                             | gij16272119  | HI_0151      | 46  | CP | -     | -      | -      | 89-23  | 65-51  | 109-51 |
| 30S ribosomal protein S1                                                 | gij16273139  | HI_1220      | 60  | CP | -     | -      | -      | 88-24  | 96-24  | 118-39 |
| 30S ribosomal protein S10                                                | gij161350025 | HI_0776      | 12  | CP | -     | -      | -      | 84-26  | 65-50  | 92-69  |
| Na(+)-translocating NADH-quinone reductase subunit A                     | gij16272131  | HI_0164      | 49  | CP | -     | -      | -      | 84-27  | 97-23  | 170-25 |
| Dihydrolipoamide acetyltransferase                                       | gij16273151  | HI_1232      | 59  | CP | -     | -      | -      | 84-28  | -      | -      |
| F0F1 ATP synthase subunit B                                              | gij16272430  | HI_0483      | 17  | IM | -     | -      | -      | 81-29  | 107-18 | 123-36 |
| Outer membrane protein                                                   | gij16272337  | HI_0389      | 21  | OM | -     | -      | -      | 78-31  | -      | -      |
| 50S ribosomal protein L6                                                 | gij16272734  | HI_0793      | 19  | CP | -     | -      | -      | 78-32  | -      | -      |
| F0F1 ATP synthase subunit alpha                                          | gij16272428  | HI_0481      | 56  | CP | -     | -      | -      | 77-33  | -      | -      |
| Lipoprotein VacJ                                                         | gij16272658  | HI_0718      | 28  | OM | -     | -      | -      | 72-36  | -      | 76-94  |
| Preprotein translocase subunit SecD                                      | gij16272200  | HI_0240      | 67  | IM | -     | -      | -      | 70-37  | -      | 86-77  |
| Galactose/methyl galactoside transporter ATP-binding protein MglA        | gij16272764  | HI_0823      | 57  | IM | -     | -      | -      | 70-38  | 94-25  | 82-82  |
| 50S ribosomal protein L28                                                | gij16272889  | HI_0951      | 9   | CP | -     | -      | -      | 66-39  | 63-54  | 67-106 |
| Lipoprotein (HI0162)                                                     | gij16272129  | HI_0162      | 22  | U  | -     | -      | -      | 65-41  | -      | -      |
| Preprotein translocase subunit YajC                                      | gij16272201  | HI_0241      | 11  | IM | -     | -      | -      | 64-42  | -      | -      |
| 30S ribosomal protein S3                                                 | gij16272724  | HI_0783      | 26  | CP | -     | -      | -      | 63-43  | -      | 74-96  |
| Thiamine biosynthesis lipoprotein                                        | gij16272137  | HI_0172      | 38  | U  | -     | -      | -      | 62-44  | -      | -      |
| Chaperonin GroEL                                                         | gij16272487  | HI_0543      | 58  | CP | -     | -      | -      | 62-45  | 75-39  | -      |
| Extragenic suppressor, Inositol monophosphatase SuhB                     | gij16272874  | HI_0937      | 29  | CP | -     | -      | -      | 61-47  | -      | 89-74  |
| Heme biosynthesis-like protein                                           | gij30995388  | HI_0603m     | 45  | U  | -     | -      | -      | -      | 125-14 | 186-20 |
| Na(+)-translocating NADH-quinone reductase subunit C                     | gij16272133  | HI_0167      | 27  | U  | -     | -      | -      | -      | 104-20 | 121-37 |
| Hypothetical protein HI0370                                              | gij16272318  | HI_0370      | 23  | U  | -     | -      | -      | -      | 100-21 | -      |
| 50S ribosomal protein L5                                                 | gij542123255 | HI_0790      | 20  | CP | -     | -      | -      | -      | 89-27  | 200-18 |
| Hypothetical protein HI0442                                              | gij30995376  | HI_0442      | 12  | U  | -     | -      | -      | -      | 85-29  | 117-41 |
| Pyruvate dehydrogenase subunit E1                                        | gij16273152  | HI_1233      | 99  | CP | -     | -      | -      | -      | 85-30  | -      |

|                                                             |              |           |     |    |   |   |   |   |       |        |
|-------------------------------------------------------------|--------------|-----------|-----|----|---|---|---|---|-------|--------|
| Hypothetical protein HI1462, outer membrane efflux protein  | gij16273365  | HI_1462   | 50  | OM | - | - | - | - | 78-34 | 215-14 |
| NAD(P) transhydrogenase subunit alpha                       | gij16273272  | HI_1362   | 55  | IM | - | - | - | - | 77-36 | 233-12 |
| Phosphomannomutase                                          | gij30995397  | HI_0740   | 60  | CP | - | - | - | - | 76-38 | 108-52 |
| Anaerobic dimethyl sulfoxide reductase subunit B            | gij16272978  | HI_1046   | 23  | IM | - | - | - | - | 75-40 | -      |
| Phosphate acetyltransferase                                 | gij16273123  | HI_1203   | 77  | CP | - | - | - | - | 75-41 | 124-35 |
| Organic solvent tolerance protein, LPS-assembly protein     | gij16272671  | HI_0730   | 90  | OM | - | - | - | - | 73-42 | 103-57 |
| Single-stranded DNA-binding protein                         | gij16272208  | HI_0250   | 19  | CP | - | - | - | - | 70-44 | -      |
| Polynucleotide phosphorylase/polyadenylase                  | gij16272192  | HI_0229   | 77  | CP | - | - | - | - | 70-45 | 98-60  |
| 30S ribosomal protein S6                                    | gij16272491  | HI_0547   | 14  | CP | - | - | - | - | 69-46 | 94-68  |
| 30S ribosomal protein S7                                    | gij16272524  | HI_0580   | 18  | CP | - | - | - | - | 68-47 | 98-61  |
| LexA repressor                                              | gij30995398  | HI_0749   | 23  | CP | - | - | - | - | 66-49 | -      |
| Hypothetical protein HI1628                                 | gij16273517  | HI_1628   | 15  | IM | - | - | - | - | 65-52 | 66-108 |
| 50S ribosomal protein L24                                   | gij16272730  | HI_0789   | 11  | CP | - | - | - | - | 63-53 | 184-23 |
| Acetolactate synthase 3 regulatory subunit                  | gij16273478  | HI_1584   | 18  | CP | - | - | - | - | 63-55 | 63-112 |
| Nitrate/nitrite response regulator protein NarP             | gij16272666  | HI_0726   | 23  | CP | - | - | - | - | 62-56 | -      |
| Sec-independent translocase TatB                            | gij16273632  | HI_0187b  | 20  | IM | - | - | - | - | 60-61 | 80-87  |
| Universal stress protein A                                  | gij16272756  | HI_0815   | 16  | CP | - | - | - | - | 60-62 | 95-64  |
| Hypothetical protein HI0150, membrane protease subunit HflC | gij16272118  | HI_0150   | 33  | CP | - | - | - | - | -     | 185-22 |
| Ferric transporter ATP-binding protein                      | gij16272096  | HI_0126   | 36  | IM | - | - | - | - | -     | 125-34 |
| 30S ribosomal protein S4                                    | gij16272743  | HI_0801   | 24  | CP | - | - | - | - | -     | 120-38 |
| Protoheme synthesis protein HemY                            | gij16272545  | HI_0602   | 49  | IM | - | - | - | - | -     | 118-40 |
| 50S ribosomal protein L2                                    | gij16272721  | HI_0780   | 30  | CP | - | - | - | - | -     | 114-44 |
| Inner membrane protein translocase component YidC           | gij16272937  | HI_1001   | 61  | IM | - | - | - | - | -     | 113-46 |
| DNA-directed RNA polymerase subunit beta'                   | gij16272458  | HI_0514   | 157 | CP | - | - | - | - | -     | 111-48 |
| HIT-like protein                                            | gij30995412  | HI_0961   | 13  | CP | - | - | - | - | -     | 111-49 |
| Ribonuclease E                                              | gij30995373  | HI_0413   | 107 | CP | - | - | - | - | -     | 111-50 |
| 50S ribosomal protein L1                                    | gij16272460  | HI_0516   | 24  | CP | - | - | - | - | -     | 106-53 |
| 30S ribosomal protein S2                                    | gij161350022 | HI_0913   | 26  | CP | - | - | - | - | -     | 105-55 |
| Membrane-fusion protein                                     | gij16272832  | HI_0894   | 41  | IM | - | - | - | - | -     | 102-58 |
| 30S ribosomal protein S8                                    | gij16272733  | HI_0792   | 14  | CP | - | - | - | - | -     | 101-59 |
| 50S ribosomal protein L22                                   | gij16272723  | HI_0782   | 12  | CP | - | - | - | - | -     | 96-63  |
| Fumarate reductase flavoprotein subunit                     | gij16272776  | HI_0835   | 66  | IM | - | - | - | - | -     | 94-65  |
| ATP-dependent Clp protease ATPase subunit                   | gij16272799  | HI_0859   | 96  | CP | - | - | - | - | -     | 94-67  |
| Pyridine nucleotide transhydrogenase                        | gij16273273  | HI_1363   | 50  | IM | - | - | - | - | -     | 91-70  |
| Acetate kinase                                              | gij16273124  | HI_1204   | 44  | CP | - | - | - | - | -     | 90-71  |
| Potassium efflux protein KefA                               | gij16272159  | HI_0195.1 | 127 | IM | - | - | - | - | -     | 90-72  |
| Penicillin-binding protein 1A                               | gij16272388  | HI_0440   | 95  | IM | - | - | - | - | -     | 90-73  |
| 50S ribosomal protein L23                                   | gij16272720  | HI_0779   | 11  | CP | - | - | - | - | -     | 88-75  |
| 30S ribosomal protein S18                                   | gij16272489  | HI_0545   | 9   | CP | - | - | - | - | -     | 83-80  |
| 50S ribosomal protein L16                                   | gij16272725  | HI_0784   | 15  | CP | - | - | - | - | -     | 82-81  |
| ATPase Mrp                                                  | gij30995435  | HI_1277   | 40  | U  | - | - | - | - | -     | 81-83  |
| Ferric uptake regulation protein                            | gij16272154  | HI_0190   | 17  | CP | - | - | - | - | -     | 81-84  |
| 50S ribosomal protein L4                                    | gij16272719  | HI_0778   | 22  | CP | - | - | - | - | -     | 81-85  |
| 30S ribosomal protein S16                                   | gij16272167  | HI_0204   | 9   | CP | - | - | - | - | -     | 80-86  |
| NADH dehydrogenase                                          | gij16272688  | HI_0747   | 49  | IM | - | - | - | - | -     | 80-88  |
| Alanyl-tRNA synthetase                                      | gij16272755  | HI_0814   | 97  | CP | - | - | - | - | -     | 79-89  |
| 50S ribosomal protein L3                                    | gij16272718  | HI_0777   | 22  | CP | - | - | - | - | -     | 78-90  |
| Lipoprotein B                                               | gij16272646  | HI_0706   | 43  | OM | - | - | - | - | -     | 78-91  |
| 50S ribosomal protein L10                                   | gij16272583  | HI_0640   | 18  | CP | - | - | - | - | -     | 77-92  |
| GTP-binding protein EngA                                    | gij16272103  | HI_0136   | 56  | CP | - | - | - | - | -     | 76-93  |
| Colicin uptake protein TolR                                 | gij16272332  | HI_0384   | 15  | IM | - | - | - | - | -     | 73-97  |

|                                                 |             |         |     |    |   |   |   |   |   |        |
|-------------------------------------------------|-------------|---------|-----|----|---|---|---|---|---|--------|
| Putative peptidase B                            | gij17865546 | HI_0875 | 47  | CP | - | - | - | - | - | 72-98  |
| Phosphoglycerate kinase                         | gij16272469 | HI_0525 | 41  | CP | - | - | - | - | - | 72-99  |
| Rare lipoprotein B                              | gij30995409 | HI_0922 | 19  | OM | - | - | - | - | - | 72-100 |
| DL-methionine transporter ATP-binding protein   | gij16272563 | HI_0621 | 38  | IM | - | - | - | - | - | 71-101 |
| Opacity associated protein                      | gij16272282 | HI_0330 | 47  | EC | - | - | - | - | - | 68-102 |
| 50S ribosomal protein L20                       | gij16273230 | HI_1320 | 13  | CP | - | - | - | - | - | 68-103 |
| Hypothetical protein HI1168                     | gij16273092 | HI_1168 | 14  | CP | - | - | - | - | - | 67-104 |
| 50S ribosomal protein L15                       | gij16272738 | HI_0797 | 15  | CP | - | - | - | - | - | 67-105 |
| TonB                                            | gij16272209 | HI_0251 | 29  | U  | - | - | - | - | - | 67-107 |
| Hypothetical protein HI0696                     | gij16272638 | HI_0696 | 141 | OM | - | - | - | - | - | 64-110 |
| DNA-directed RNA polymerase subunit alpha       | gij16272744 | HI_0802 | 36  | CP | - | - | - | - | - | 63-111 |
| ATP-dependent protease ATP-binding subunit HslU | gij16272441 | HI_0497 | 49  | CP | - | - | - | - | - | 63-113 |
| Uridine phosphorylase                           | gij30995365 | HI_0280 | 27  | CP | - | - | - | - | - | 62-114 |
| Type II restriction endonuclease                | gij16273303 | HI_1393 | 35  | CP | - | - | - | - | - | 61-115 |
| cAMP-regulatory protein                         | gij16272895 | HI_0957 | 25  | CP | - | - | - | - | - | 61-116 |

<sup>1</sup>Identified proteins are ordered by their ion scores based on their first identification in density gradient purified preparations of Rd KW20 OMV followed by Rd  $\Delta vacJ$  OMV, Rd  $\Delta yrbE$  OMV, Rd KW20 OM, Rd  $\Delta vacJ$  OM, and Rd  $\Delta yrbE$  OM.

<sup>†</sup>Computed molecular protein masses in kDa according to ProtParam (<http://web.expasy.org/protparam/>).

<sup>‡</sup>Predicted subcellular protein localization according to PSORTb v3.0.2 (<http://www.psort.org/psortb/>). Abbreviations were used as follows: EC, extracellular; OM, outer membrane; PP, periplasmic; IM, inner membrane; CP, cytoplasmic; U, unknown.

<sup>§</sup>Results are given by the ion score and the ranking number of an identified protein within a respective preparation separated by a hyphen. A single dash indicates that the given protein either could not be detected in the respective preparation or showed an ion score below the identity threshold and was thus considered as not significant.

**Supplementary Table 3: Bacterial strains and plasmids used in this study.**

| Strain or plasmid                   | Relevant characteristic                                                                                                                                          | Reference  |
|-------------------------------------|------------------------------------------------------------------------------------------------------------------------------------------------------------------|------------|
| <b><i>H. influenzae</i> strains</b> |                                                                                                                                                                  |            |
| Rd KW20                             | Unencapsulated variant of a former capsular serotype d strain, obtained from A. Wright                                                                           | 9          |
| Rd AK01                             | Point mutation ( <i>sxy-1</i> ) of <i>tfoX</i> in Rd KW20, Sm <sup>r</sup>                                                                                       | 10         |
| Rd $\Delta vacJ$                    | Deletion of <i>vacJ</i> (HI_0718) in Rd KW20, Cm <sup>r</sup>                                                                                                    | This study |
| Rd $\Delta yrbE$                    | Deletion of <i>yrbE</i> (HI_1086) in Rd KW20, Cm <sup>r</sup>                                                                                                    | This study |
| Rd $\Delta fur$                     | Deletion of <i>fur</i> (HI_0190) in Rd KW20, Cm <sup>r</sup>                                                                                                     | This study |
| Rd $\Delta vacJ::vacJ$              | <i>In cis</i> complementation of <i>vacJ</i> (HI_0718) in Rd $\Delta vacJ$ , Km <sup>r</sup>                                                                     | This study |
| Rd $\Delta yrbE::yrbE$              | <i>In cis</i> complementation of <i>yrbE</i> (HI_1086) in Rd $\Delta yrbE$ , Km <sup>r</sup>                                                                     | This study |
| NTHi 1479-R                         | Spontaneous Sm <sup>r</sup> derivative of NTHi 1479                                                                                                              | 11         |
| NTHi 2019-R                         | Spontaneous Sm <sup>r</sup> derivative of NTHi 2019                                                                                                              | 11         |
| <b><i>V. cholerae</i> strains</b>   |                                                                                                                                                                  |            |
| Vc AC53                             | Spontaneous Sm <sup>r</sup> derivative of E7946 (O1 El Tor Ogawa, clinical isolate from Bahrain 1978)                                                            | 12         |
| Vc $\Delta vacJ$                    | Deletion of <i>vacJ</i> (VC_2048) in Vc AC53, Sm <sup>r</sup>                                                                                                    | This study |
| Vc $\Delta yrbE$                    | Deletion of <i>yrbE</i> (VC_2519) in Vc AC53, Sm <sup>r</sup>                                                                                                    | This study |
| Vc $\Delta fur$                     | Deletion of <i>fur</i> (VC_2106) in Vc AC53, Sm <sup>r</sup>                                                                                                     | This study |
| <b><i>E. coli</i> strains</b>       |                                                                                                                                                                  |            |
| DH5 $\alpha$ .pir                   | F- <i>endA1 glnV44 thi-1 recA1 relA1 gyrA96 deoR nupG</i> $\Phi$ 80 <i>dlacZ_M15_(lacZYAargF)</i> U169, <i>hsdR17</i> (rK-mK+), <i>lpirRK6</i> , Ap <sup>r</sup> | 13         |
| SM10 $\lambda$ .pir                 | <i>thi thr leu tonA lacY supE recA::RPA-2-Te::Mu lpirRK6</i> , Km <sup>r</sup>                                                                                   | 14         |
| Ec BW                               | <i>E. coli</i> K12 BW25113; <i>rnnB3</i> $\Delta$ <i>lacZ4787 hsdR514</i> $\Delta$ ( <i>araBAD</i> )567 $\Delta$ ( <i>rhaBAD</i> )568 <i>rph-1</i>               | 15         |
| Ec $\Delta fur$                     | Deletion of <i>fur</i> (ECK_0671) in Ec BW, Km <sup>r</sup>                                                                                                      | 15         |
| <b>Plasmids</b>                     |                                                                                                                                                                  |            |
| pAKcat                              | pACYC177, Tn10 <i>d-cat</i> , Km <sup>r</sup> , Ap <sup>r</sup>                                                                                                  | 16         |
| pACYC177                            | <i>npt</i> , Km <sup>r</sup> , Ap <sup>r</sup>                                                                                                                   | 17         |
| pCVD442                             | <i>oriR6K mobRP4 sacB</i> , Ap <sup>r</sup>                                                                                                                      | 18         |
| pCVD $\Delta vacJ$                  | Suicide plasmid for construction of Vc $\Delta vacJ$ , pCVD442:: <i>vacJ</i> , Ap <sup>r</sup>                                                                   | This study |
| pCVD $\Delta yrbE$                  | Suicide plasmid for construction of Vc $\Delta yrbE$ , pCVD442:: <i>yrbE</i> , Ap <sup>r</sup>                                                                   | This study |
| pCVD $\Delta fur$                   | Suicide plasmid for construction of Vc $\Delta fur$ , pCVD442:: <i>fur</i> , Ap <sup>r</sup>                                                                     | This study |
| pBAD                                | pBAD24, arabinose-inducible, Ap <sup>r</sup>                                                                                                                     | 19         |
| pBAD <i>mlaF-B</i>                  | Expression plasmid with <i>mlaF</i> , <i>E</i> , <i>D</i> , <i>C</i> , and <i>B</i> (b_3195 to b_3191) in pBAD24, Ap <sup>r</sup>                                | This study |
| p                                   | pMMB67EH, IncQ broad-host-range low-copy-number cloning vector, IPTG-inducible, Ap <sup>r</sup>                                                                  | 20         |
| p <i>vacJ</i>                       | Expression plasmid with <i>vacJ</i> (VC_2048) in pMMB67EH, Ap <sup>r</sup>                                                                                       | This study |
| p <i>yrbE</i>                       | Expression plasmid with <i>yrbE</i> (VC_2519) in pMMB67EH, Ap <sup>r</sup>                                                                                       | This study |



**Supplementary Table 4: Oligonucleotide primers used in this study.**

| Usage                                      | Oligonucleotide       | Sequence (5' to 3')                                           |
|--------------------------------------------|-----------------------|---------------------------------------------------------------|
| Transposon mutagenesis                     | USS+                  | N6AAAGTGCGGT                                                  |
|                                            | USS-                  | N7ACCGCACTT                                                   |
|                                            | blainv                | CCGTAAGATGCTTTTCTGTGACTGGT                                    |
|                                            | blarev                | AGTCAGGCAACTATGGATGAACGAAAT                                   |
|                                            | IS10seq_blainv        | CAACTGATCTTCAGCATCTTTTAC                                      |
| Construction of Rd $\Delta vacJ$           | IS10seq_blarev        | TGCCTCACTGATTAAGCATTGGTA                                      |
|                                            | HI0718_up_fw          | GGGGTAACAATGATTGCTTCTC                                        |
|                                            | HI0718_up_rv          | <b>TGTATGATGGTGTTTTGAGGTGTTTTAATCCTTACATAAATATGGGAT</b>       |
|                                            | HI0718_cat_fw         | <b>ATCCCATATTTATGTAAGGATTAACACCTCAAAAACACCATCATACA</b>        |
|                                            | HI0718_cat_rv         | <b>AATTTTTACCGCACTTTTCTGTTAAAGGCGTTAAGGGCACCAATAA</b>         |
| Construction of Rd $\Delta yrbE$           | HI0718_down_fw        | <b>TTATTGGTGCCCTTAAACGCCTTAAACAGAAAAGTGCGGTAAAAATT</b>        |
|                                            | HI0718_down_rv        | TCCATCTACAGAACGTAATGCC                                        |
|                                            | HI1086_up_fw          | ATAAACGAGATATTAATGAATCAAAAT                                   |
|                                            | HI1086_up_rv          | <b>TGTATGATGGTGTTTTGAGGTGATCATTCAACAATTCCTTCACA</b>           |
|                                            | HI1086_cat_fw         | <b>TGTGAAGGAATTGTTGAATGATCCACCTCAAAAACACCATCATACA</b>         |
| Construction of Rd $\Delta fur$            | HI1086_cat_rv         | <b>TTGTTTGTCTCATAAAAAATCCTTAAGGCGTTAAGGGCACCAATAA</b>         |
|                                            | HI1086_down_fw        | <b>TTATTGGTGCCCTTAAACGCCTTAAAGGATTTTTTATGAGACAAACAA</b>       |
|                                            | HI1086_down_rv        | GCAGAGGTTGATTTGTAGTATGA                                       |
|                                            | HI0190_up_fw          | ATGGTAGTGACTGGAA                                              |
|                                            | HI0190_up_rv          | <b>TGTATGATGGTGTTTTGAGGTGAATTTTCCTTCCTATTAT</b>               |
| Construction of Rd $\Delta vacJ::vacJ$     | HI0190_cat_fw         | <b>ATAATAGGAAGGAAAATTCACCTCAAAAACACCATCATACA</b>              |
|                                            | HI0190_cat_rv         | <b>GAATATAAGAAAGCGACATTTTGTGCGCTTAGAGTTAAGGGCACCAATAACTGC</b> |
|                                            | HI0190_down_fw        | <b>GCAGTTATTGGTGCCCTTAAACTTAAGGCGACAAAATGTCGCTTCTTATATTC</b>  |
|                                            | HI0190_down_rv        | TGAATTAGAATTTCTGATGCACA                                       |
|                                            | vacJ_compl_up_fw      | GGGGTAACAATGATTGCTTCTC                                        |
| Construction of Rd $\Delta yrbE::yrbE$     | vacJ_compl_up_rv      | <b>TCTTGTGCAATGTAACATCAGAGTTTCTCCTTAGTTGATAAAAAATTG</b>       |
|                                            | vacJ_compl_npt_fw     | <b>TTTTTCAACTAAGGAGAAACTCTGATGTTACATTGCACAAGA</b>             |
|                                            | vacJ_compl_npt_rv     | <b>AATTTTTACCGCACTTTTCTGTTTACGTGAAGAAGGTGTTGCTGAC</b>         |
|                                            | vacJ_compl_down_fw    | <b>GTCAGCAACACCTTCTTCAGTAAACAGAAAAGTGCGGTAAAAATT</b>          |
|                                            | vacJ_compl_down_rv    | TCCATCTACAGAACGTAATGCC                                        |
| Validation of correct construction         | yrbE_compl_up_fw      | ATAAACGAGATATTAATGAATCAAAAT                                   |
|                                            | yrbE_compl_up_rv      | <b>TCTTGTGCAATGTAACATCAGAGTTAACCTGCGCCAAACATAATAG</b>         |
|                                            | yrbE_compl_npt_fw     | <b>CTATTATGTTTGGCGCAGGTTAACTCTGATGTTACATTGCACAAGA</b>         |
|                                            | yrbE_compl_npt_rv     | <b>TAATTGTTTGTCTCATAAAAAATCCTTAGAAAACTCATCGAGCATCAAA</b>      |
|                                            | yrbE_compl_down_fw    | <b>TTTGATGCTCGATGAGTTTTCTAAGGATTTTTTATGAGACAAACAATTA</b>      |
| Construction of Vc $\Delta vacJ$           | yrbE_compl_down_rv    | GCAGAGGTTGATTTGTAGTATGA                                       |
|                                            | HI0718_test_fw        | CTGAAGCGCGTCAAACAAC                                           |
|                                            | HI1086_test_fw        | GGTCATATAAACTGATTGAAC                                         |
|                                            | HI0190_test_fw        | ATGGCAATAGTTGGTCT                                             |
|                                            | cat_test_rv           | GCGTTTAAAGGGCACCAATAA                                         |
| Construction of Vc $\Delta yrbE$           | npt_test_rv           | AACCGTTATTCATTCGTGATTGC                                       |
|                                            | VC2048_Xbal_up_fw     | <b>AAATCTAGACTGCATTATCAGCCTG</b>                              |
|                                            | VC2048_EcoRI_up_rv    | <b>AAAGAATTC</b> CAAAGGCCGATGATCCCA                           |
|                                            | VC2048_EcoRI_down_fw  | <b>AATGAATTC</b> TGATGGTCTCTGAAATCA                           |
|                                            | VC2048_SacI_down_rv   | <b>AAAGAGCTC</b> TTTAAATTTTTTGTGAATGGATG                      |
| Construction of Vc $\Delta fur$            | VC2519_Xbal_up_fw     | <b>AAATCTAGACTTAGTACCATCAAAAATT</b>                           |
|                                            | VC2519_EcoRI_up_rv    | <b>AAAGAATTC</b> CACATCATTTAGCACTAAACA                        |
|                                            | VC2519_EcoRI_down_fw  | <b>AAAGAATTC</b> ATGTTTGGGAATGATCATGC                         |
|                                            | VC2519_SacI_down_rv   | <b>AAAGAGCTC</b> CGCCACATCTTCACGTT                            |
|                                            | VC2106_SacI_up_fw     | <b>TTAGAGCTC</b> ACCTCCGAAACCACTTCGC                          |
| Construction of pvacJ                      | VC2106_Sall_up_rv     | <b>ATAGTCGAC</b> ATACTTTCTGTTGATGTTCTG                        |
|                                            | VC2106_Sall_down_fw   | <b>AAAGTCGAC</b> CCATAGGCTTACGCTCTGT                          |
|                                            | VC2106_Xbal_down_rv   | <b>TTATCTAGA</b> ACTTCCGTTACGACTACGAC                         |
|                                            | VC2048_compl_EcoRI_fw | <b>ATCGTTGAATTC</b> CAATAAGGCCGATGGG                          |
|                                            | VC2048_compl_Xbal_rv  | <b>GTTCTAGATCATA</b> ACCCTTCATTTAAATA                         |
| Construction of pyrBE                      | VC2519_compl_EcoRI_fw | <b>TAGGATGAATTC</b> TAGTGCTAAATGATGTG                         |
|                                            | VC2519_compl_Xbal_rv  | <b>AATCTAGATCAGT</b> CCCAACATCAATG                            |
| Construction of pBADmlaF-B                 | mlaF_EcoRI_fw         | <b>AAAGAATTC</b> GAGCAGTCTGTGGCGAATTTA                        |
|                                            | mlaB_Xbal_rv          | <b>AAATCTAGA</b> TAAACGAGGCAGAACATCAGC                        |
| Quantitative real-time RT-PCR <sup>†</sup> | HI_rpoB-F             | CGGTTTGTGCGGTGTTGAAAG                                         |
|                                            | HI_rpoB-R             | TAAGTCTTGTGGCGTGATCG                                          |
|                                            | HI_vacJ-F             | TCCGTGGGCATTAGTGAAT                                           |
|                                            | HI_vacJ-R             | AATTCTGCATTATTGAGATTTTTCG                                     |
|                                            | HI_yrbE-F             | TCGTGTTAATCGATTTTTCTGC                                        |
|                                            | HI_yrbE-R             | CAGGGCCTAATTCCTGTAAG                                          |

|           |                         |
|-----------|-------------------------|
| HI_fabB-F | CTAGAGGTGTAAGGCGATTGG   |
| HI_fabB-R | GGAGTAGCTAAACAGGCAGAAA  |
| HI_fabD-F | AGCTGCTTCAGTCGCTATTT    |
| HI_fabD-R | GCTATGACCTGCCATCACTT    |
| HI_fabH-F | CTGTTGTGCTATTTGGTGATGG  |
| HI_fabH-R | GCGTGTAATGGGTGGAGATA    |
| VC_rpoB-F | CTGTCTCAAGCCGGTTACAA    |
| VC_rpoB-R | TTTCTACCAAGTCAGAGATGC   |
| VC_vacJ-F | AGTTTCGCAAGAGGCCTTATTA  |
| VC_vacJ-R | AGCTTGCCGTTGGAGATAAG    |
| VC_yrbE-F | GTTCCGCAAGTTATACAGCATTG |
| VC_yrbE-R | CTGAGCACCATGCCAATAAAG   |
| EC_rpoB-F | AACTGCGTCTGGTGATCTATG   |
| EC_rpoB-R | GCCCATGTAGACTTCTTGTCT   |
| EC_vacJ-F | GGTGATATGGCGGATGGTTT    |
| EC_vacJ-R | TCCCTTCAAGCGTCCATTTAC   |
| EC_yrbE-F | GGTGCGCCAGCTCTATAAT     |
| EC_yrbE-R | CAACACCATTCCGATGAACAC   |

---

\* Non-complementary nucleotides are given in bold letters and restriction sites are underlined.

† Oligonucleotide names designated with HI, VC, or EC refer to primers for *H. influenzae*, *V. cholerae*, or *E. coli*, respectively.

## SUPPLEMENTARY REFERENCES

1. Reese, M.G. Application of a time-delay neural network to promoter annotation in the *Drosophila melanogaster* genome. *Comput. Chem.* **26**, 51-56 (2001).
2. Rice, P., Longden, I. & Bleasby, A. EMBOSS: the European Molecular Biology Open Software Suite. *Trends Genet.* **16**, 276-277 (2000).
3. Li, W. *et al.* The EMBL-EBI bioinformatics web and programmatic tools framework. *Nucleic Acids Res.* **43**, W580-584 (2015).
4. Goujon, M. *et al.* A new bioinformatics analysis tools framework at EMBL-EBI. *Nucleic Acids Res.* **38**, W695-699 (2010).
5. McWilliam, H. *et al.* Analysis Tool Web Services from the EMBL-EBI. *Nucleic Acids Res.* **41**, W597-600 (2013).
6. Harrison, A. *et al.* Ferric uptake regulator and its role in the pathogenesis of nontypeable *Haemophilus influenzae*. *Infect. Immun.* **81**, 1221-1233 (2013).
7. Escolar, L., Perez-Martin, J. & de Lorenzo, V. Opening the iron box: transcriptional metalloregulation by the Fur protein. *J. Bacteriol.* **181**, 6223-6229 (1999).
8. Mey, A.R., Wyckoff, E.E., Kanukurthy, V., Fisher, C.R. & Payne, S.M. Iron and Fur regulation in *Vibrio cholerae* and the role of Fur in virulence. *Infect. Immun.* **73**, 8167-8178 (2005).
9. Wilcox, K.W. & Smith, H.O. Isolation and characterization of mutants of *Haemophilus influenzae* deficient in an adenosine 5'-triphosphate-dependent deoxyribonuclease activity. *J. Bacteriol.* **122**, 443-453 (1975).
10. Herbert, M., Kraiss, A., Hilpert, A.K., Schlor, S. & Reidl, J. Aerobic growth deficient *Haemophilus influenzae* mutants are non-virulent: implications on metabolism. *Int. J. Med. Microbiol.* **293**, 145-152 (2003).
11. Roier, S. *et al.* Intranasal immunization with nontypeable *Haemophilus influenzae* outer membrane vesicles induces cross-protective immunity in mice. *PLoS One* **7**, e42664 (2012).

12. Miller, V.L., DiRita, V.J. & Mekalanos, J.J. Identification of *toxS*, a regulatory gene whose product enhances *toxR*-mediated activation of the cholera toxin promoter. *J. Bacteriol.* **171**, 1288-1293 (1989).
13. Hanahan, D. Studies on transformation of *Escherichia coli* with plasmids. *J. Mol. Biol.* **166**, 557-580 (1983).
14. Miller, V.L. & Mekalanos, J.J. A novel suicide vector and its use in construction of insertion mutations: osmoregulation of outer membrane proteins and virulence determinants in *Vibrio cholerae* requires *toxR*. *J. Bacteriol.* **170**, 2575-2583 (1988).
15. Baba, T. *et al.* Construction of *Escherichia coli* K-12 in-frame, single-gene knockout mutants: the Keio collection. *Mol. Syst. Biol.* **2**, 2006 0008 (2006).
16. Kraiss, A., Schlor, S. & Reidl, J. In vivo transposon mutagenesis in *Haemophilus influenzae*. *Appl. Environ. Microbiol.* **64**, 4697-4702 (1998).
17. Rose, R.E. The nucleotide sequence of pACYC177. *Nucleic Acids Res.* **16**, 356 (1988).
18. Donnenberg, M.S. & Kaper, J.B. Construction of an *eae* deletion mutant of enteropathogenic *Escherichia coli* by using a positive-selection suicide vector. *Infect. Immun.* **59**, 4310-4317 (1991).
19. Guzman, L.M., Belin, D., Carson, M.J. & Beckwith, J. Tight regulation, modulation, and high-level expression by vectors containing the arabinose pBAD promoter. *J. Bacteriol.* **177**, 4121-4130 (1995).
20. Morales, V.M., Backman, A. & Bagdasarian, M. A series of wide-host-range low-copy-number vectors that allow direct screening for recombinants. *Gene* **97**, 39-47 (1991).
